# Supplementary material
Source: ML conference proceedings conference paper supplement (https://openreview.net/forum?id=eIf9GNcA5n)
Supplement: supplementary_material [file 5567_supp.pdf › 5567_supp.pdf]

## 1 Appendix

### 2 A Implementation Details

3 Our model is trained on the official NAVSIM [1] training set Navtrain, and evaluated on the official  
4 test set Navtest. We follow the same perception setup and ResNet-34 backbone used in Transfuser for  
5 a fair comparison. Specifically, we use a concatenated front-view image of size  $1024 \times 256$  formed  
6 by three forward-facing cameras as the visual input, fused with a  $64 \times 64$  BEV LiDAR feature map.  
7 In addition, the model receives a state vector consisting of the current vehicle speed, acceleration,  
8 and navigation information. The size of the anchor vocabulary is set to  $N = 8192$ . We use fixed  
9 weights  $w_1 = 0.1$  and  $w_2 = 1.0$  for unified policy distillation. The number of frequency bands in the  
10 positional encoding is set to  $L = 10$ . The predefined safety threshold  $\tau$  is set to 0.3. All experiments  
11 are conducted on 6 NVIDIA L20 GPUs, with a batch size of 16 per GPU. We use the AdamW  
12 optimizer [2] with a learning rate of  $1e-4$ . The model is first trained for 30 epochs using unified  
13 policy distillation, followed by 10 epochs of fine-tuning with Safety DPO. We sample  $K = 1024$   
14 trajectories from the policy distribution for each DPO iteration and set the temperature parameter  
15 to  $\beta = 0.1$ . To accelerate training, the PDMS for each anchor in every scene is precomputed in  
16 advance. Following Transfuser [3], we adopt a multi-task learning strategy to enhance perception  
17 capabilities, jointly training two auxiliary tasks: 3D object detection and BEV semantic segmentation.  
18 Additionally, to further benefit policy learning, we introduce an auxiliary loss to predict the outputs  
19 of each rule-based teacher. In DPO training, inspired by [4], we introduce an explicit reverse KL  
20 regularization term to suppress distributional drift during training. Since the reference distribution  
21  $\pi_{\text{Ref}}$  targets the unified distribution  $p_{\text{unified}}$ , we directly substitute  $\pi_{\text{Ref}}$  with  $p_{\text{unified}}$  in practice.  
22 Finally, similar to [5], we continue applying the KL loss from unified policy distillation during the  
23 DPO fine-tuning stage as an auxiliary loss.

### 24 B Further Ablation Study

25 **Ablation on the Number of Sampled Candidate Trajectories.** To validate the choice of the  
26 candidate trajectory number  $K$  in Safety DPO, we conduct an ablation study as shown in Table 1. We  
27 observe that increasing  $K$  from 64 to 1024 leads to steady performance improvements. This confirms  
28 that a larger candidate pool enables the selection of more representative and challenging preference  
29 pairs, enhancing the effectiveness of DPO. However, performance drops when  $K$  increases to 2048,  
30 likely due to a lower gradient signal from very low-probability rejected trajectories. We therefore set  
31  $K = 1024$  as the default choice.

32 **Ablation on the Number of DPO Fine-Tuning Epochs.** We further investigate how the number of  
33 DPO fine-tuning epochs affects policy performance, as shown in Table 2. With 5 epochs of DPO, the  
34 policy already improves over the baseline. Further gains are achieved when increasing to 10 epochs,  
35 reaching the highest PDMS score of 90.0. However, continuing DPO fine-tuning to 20 epochs causes  
36 performance degradation, likely due to overfitting. Thus, we set the DPO fine-tuning duration to 10  
37 epochs in all experiments.

38 **Ablation on the DPO Start Epoch.** We also study when to initiate DPO fine-tuning best. As  
39 shown in Table 3, enabling DPO too early (e.g., at epoch 10) may destabilize training since the policy  
40 has not yet converged under supervised objectives. Starting DPO at epoch 30 achieves the best result,  
41 leveraging a well-initialized policy and intense pretraining supervision. Delaying DPO to epoch 40  
42 slightly reduces performance, suggesting potential overfitting. We therefore adopt epoch 30 as the  
43 default DPO start point.

### 44 C Limitations and Future Works

45 Despite the significant progress our method has made in enhancing the safety of end-to-end driving  
46 policies, several limitations warrant further study. First, our approach relies on the PDMS metric as  
47 the core criterion for safety evaluation. Although PDMS integrates multiple dimensions, including  
48 collision avoidance, drivable area compliance, ego progress, time-to-collision, and comfort, it remains  
49 a predefined weighted composite metric. As such, it cannot fully capture all potential risk factors

Table 1: **Ablation on the number of sampled candidate trajectories  $K$ .** The best result is highlighted in **bold**.

| $K$         | NC $\uparrow$ | DAC $\uparrow$ | EP $\uparrow$ | TTC $\uparrow$ | C $\uparrow$ | PDMS $\uparrow$ |
|-------------|---------------|----------------|---------------|----------------|--------------|-----------------|
| 64          | 97.9          | 97.7           | 83.9          | 93.3           | 100.0        | 89.0            |
| 256         | 97.9          | 97.8           | 84.0          | 93.6           | 100.0        | 89.2            |
| 512         | 98.1          | <b>98.2</b>    | 83.7          | 94.2           | 100.0        | 89.5            |
| <b>1024</b> | <b>98.5</b>   | 98.1           | <b>84.3</b>   | <b>94.8</b>    | 99.9         | <b>90.0</b>     |
| 2048        | 98.0          | 98.0           | 83.8          | 93.8           | 99.9         | 89.3            |

Table 2: **Ablation on the number of DPO fine-tuning epochs.** The best result is highlighted in **bold**.

| Epoch     | NC $\uparrow$ | DAC $\uparrow$ | EP $\uparrow$ | TTC $\uparrow$ | C $\uparrow$ | PDMS $\uparrow$ |
|-----------|---------------|----------------|---------------|----------------|--------------|-----------------|
| 5         | 98.3          | 97.6           | 84.9          | 93.7           | 99.9         | 89.5            |
| <b>10</b> | <b>98.5</b>   | <b>98.1</b>    | <b>84.3</b>   | <b>94.8</b>    | 99.9         | <b>90.0</b>     |
| 20        | 98.0          | 97.4           | 83.9          | 93.8           | 99.9         | 89.0            |

Table 3: **Ablation on the starting epoch for DPO fine-tuning.** The best result is highlighted in **bold**.

| Epoch     | NC $\uparrow$ | DAC $\uparrow$ | EP $\uparrow$ | TTC $\uparrow$ | C $\uparrow$ | PDMS $\uparrow$ |
|-----------|---------------|----------------|---------------|----------------|--------------|-----------------|
| 10        | 98.1          | 97.5           | 83.7          | 94.3           | 100.0        | 89.2            |
| 20        | 98.1          | 98.0           | <b>84.4</b>   | 94.2           | 100.0        | 89.7            |
| <b>30</b> | <b>98.5</b>   | <b>98.1</b>    | 84.3          | <b>94.8</b>    | 99.9         | <b>90.0</b>     |
| 40        | 98.2          | 98.0           | 84.2          | 94.0           | 100.0        | 89.5            |

in complex driving scenarios. Future work may explore more expressive and flexible trajectory evaluation metrics to build a more comprehensive safety assessment mechanism. Second, our rule-based supervision depends on high-fidelity simulators to provide rule-driven evaluation scores. While effective, the preferences derived from such simulation are inherently limited by the rules’ design and the simulator’s precision. Moreover, access to such high-fidelity simulators is scarce, constraining the scale and diversity of available data. Therefore, future research should explore preference optimization methods that do not rely on ground-truth perception labels by automatically mining latent preference structures from historical trajectory data. Such efforts could facilitate the development of weakly-supervised or even fully self-supervised safety alignment strategies.

## D Additional Qualitative Comparison

**More Comparisons with Transfuser and Hydra-MDP.** Figure 1 presents additional qualitative comparisons between our method and two baselines: Transfuser [3] and Hydra-MDP [6]. Across various challenging traffic scenes, both baselines exhibit unsafe behaviors such as collisions or off-road deviations. In contrast, our method consistently produces safer trajectories.

**More Visualizations of DPO-Enhanced Policy Behaviors.** Figure 2 shows more examples comparing policies before and after DPO fine-tuning. After applying Safety DPO, the policy demonstrates safer and more cautious behaviors.

## References

- [1] Daniel Dauner, Marcel Hallgarten, Tianyu Li, Xinshuo Weng, Zhiyu Huang, Zetong Yang, Hongyang Li, Igor Gilitschenski, Boris Ivanovic, Marco Pavone, et al. Navsim: Data-driven non-

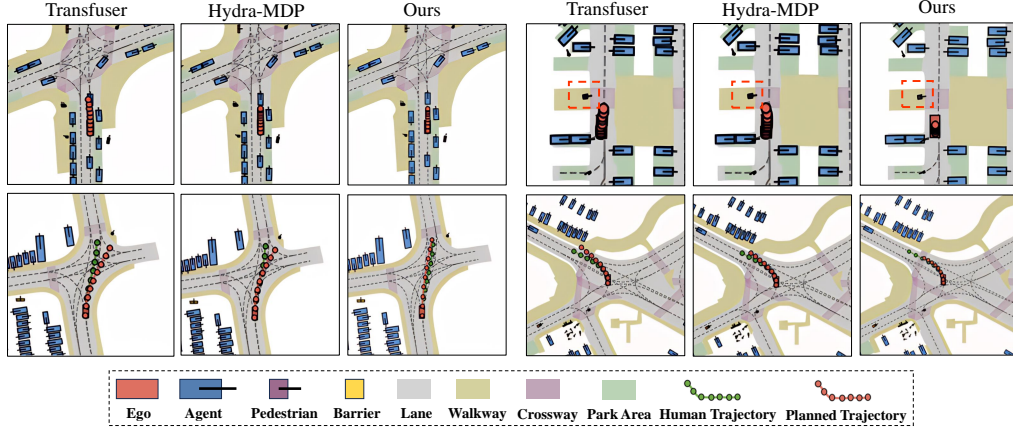

Figure 1: Additional qualitative comparisons with baselines.

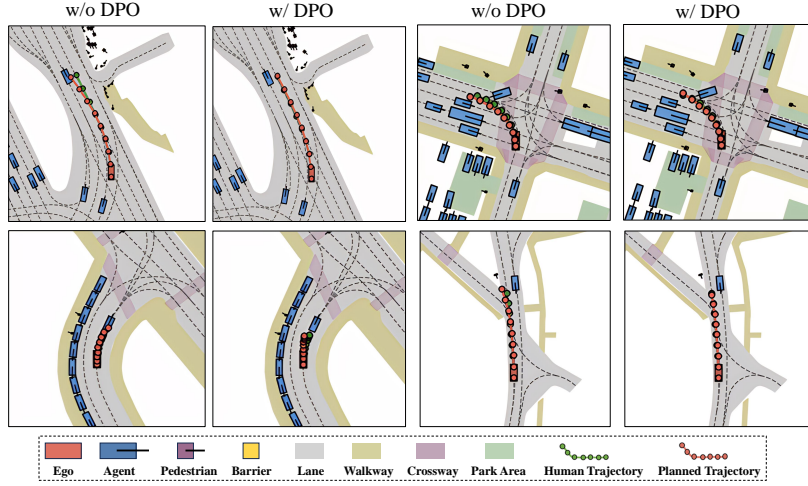

Figure 2: Additional qualitative visualizations of DPO-enhanced policy behaviors.

- 70 reactive autonomous vehicle simulation and benchmarking. In *Advances in Neural Information*  
71 *Processing Systems*, volume 37, pages 28706–28719, 2024.
- 72 [2] Ilya Loshchilov and Frank Hutter. Decoupled weight decay regularization. In *International*  
73 *Conference on Learning Representations*, 2019.
- 74 [3] Kashyap Chitta, Aditya Prakash, Bernhard Jaeger, Zehao Yu, Katrin Renz, and Andreas Geiger.  
75 Transfuser: Imitation with transformer-based sensor fusion for autonomous driving. *IEEE*  
76 *transactions on pattern analysis and machine intelligence*, 45(11):12878–12895, 2022.
- 77 [4] Xiong Wei, Hanze Dong, Chenlu Ye, Ziqi Wang, Han Zhong, Heng Ji, Nan Jiang, and Tong  
78 Zhang. Iterative preference learning from human feedback: bridging theory and practice for rlhf  
79 under kl-constraint. In *Proceedings of the 41st International Conference on Machine Learning*,  
80 pages 54715–54754, 2024.
- 81 [5] Yiren Lu, Justin Fu, George Tucker, Xinlei Pan, Eli Bronstein, Rebecca Roelofs, Benjamin  
82 Sapp, Brandyn White, Aleksandra Faust, Shimon Whiteson, et al. Imitation is not enough:  
83 Robustifying imitation with reinforcement learning for challenging driving scenarios. In *2023*  
84 *IEEE/RSJ International Conference on Intelligent Robots and Systems (IROS)*, pages 7553–7560.  
85 IEEE, 2023.

- 86 [6] Zhenxin Li, Kailin Li, Shihao Wang, Shiyi Lan, Zhiding Yu, Yishen Ji, Zhiqi Li, Ziyue Zhu,  
87 Jan Kautz, Zuxuan Wu, et al. Hydra-mdp: End-to-end multimodal planning with multi-target  
88 hydra-distillation. *arXiv preprint arXiv:2406.06978*, 2024.
